# Supplementary material for: “Figuring stuff out myself” – A qualitative study on maternal vaccination in socially and ethnically diverse areas in England
Source: Research Square preprint supplement (doi:10.21203/rs.3.rs-2760693/v1), 2023-04-11
Supplement: Supplementary file 1 [file 0b7c3b8871a4421d70df2677.pdf]

**SUPPLEMENTARY FILE 1 – Initial and revised theoretical frameworks, VIP-IDEAL study, 2022**

Figure S1 – Initial conceptual framework of factors influencing maternal vaccine uptake based on relevant literature[1-10]

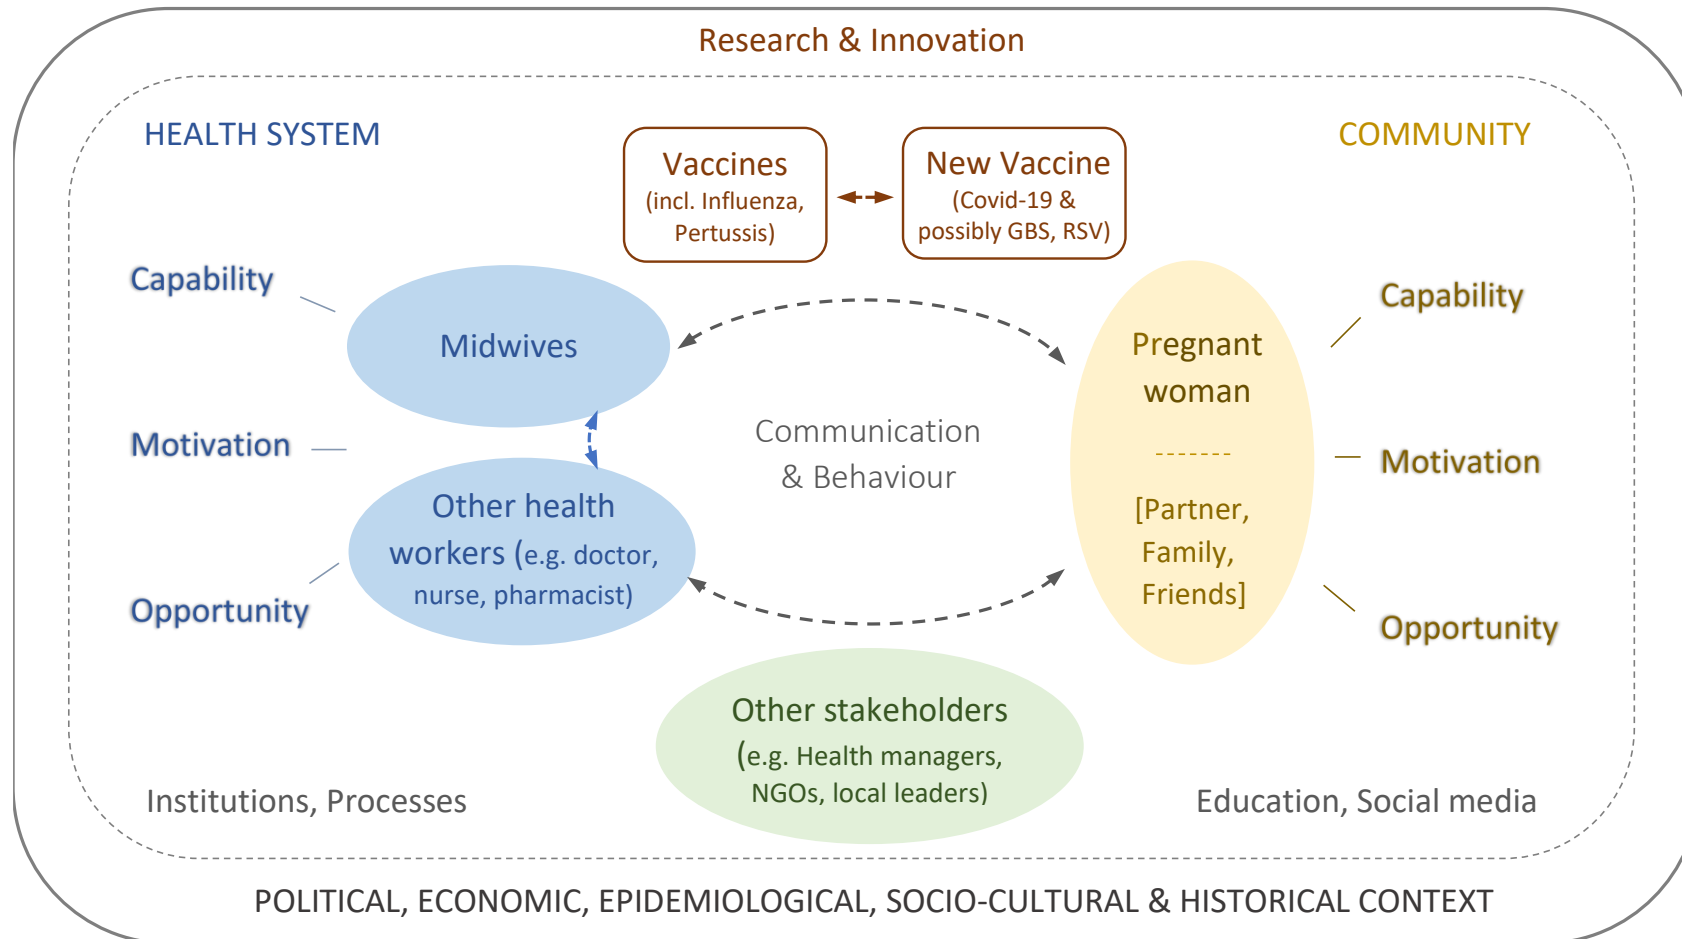

Figure S2 – Revised conceptual framework of factors influencing maternal vaccine uptake based on literature [1-10] and VIP-IDEAL study results, 2022

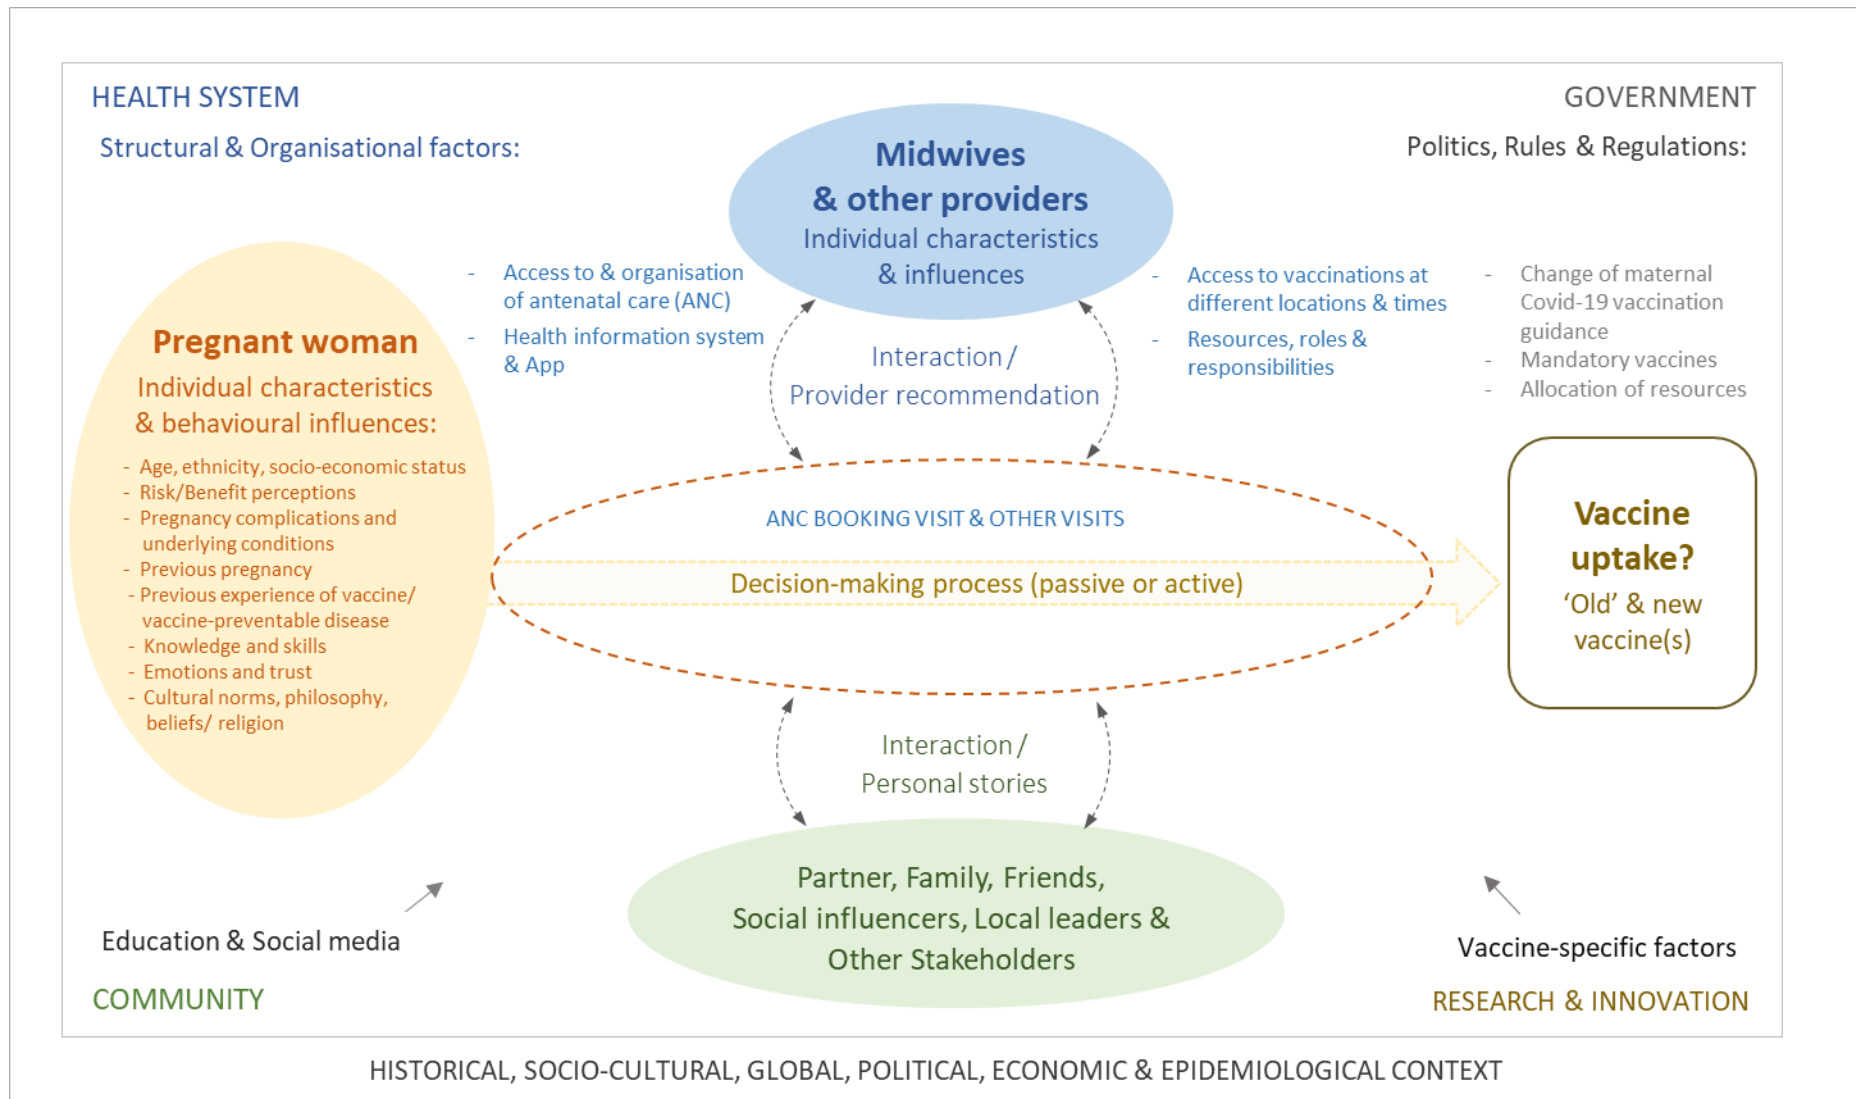

## References

1. Castillo E, Patey A, MacDonald N: **Vaccination in pregnancy: Challenges and evidence-based solutions.** *Best Practice & Research Clinical Obstetrics & Gynaecology* 2021.
2. Kilich E, Dada S, Francis MR, Tazare J, Chico RM, Paterson P, Larson HJ: **Factors that influence vaccination decision-making among pregnant women: A systematic review and meta-analysis.** *PLoS One* 2020, **15**(7):e0234827.
3. Wilson R, Paterson P, Larson HJ: **Strategies to improve maternal vaccination acceptance.** *BMC Public Health* 2019, **19**(1):342.
4. Wilson RJ, Paterson P, Jarrett C, Larson HJ: **Understanding factors influencing vaccination acceptance during pregnancy globally: A literature review.** *Vaccine* 2015, **33**(47):6420-6429.
5. Larson HJ, Jarrett C, Eckersberger E, Smith DMD, Paterson P: **Understanding vaccine hesitancy around vaccines and vaccination from a global perspective: A systematic review of published literature, 2007–2012.** *Vaccine* 2014, **32**(19):2150-2159.
6. McLeroy KR, Bibeau D, Steckler A, Glanz K: **An ecological perspective on health promotion programs.** *Health Educ Q* 1988, **15**(4):351-377.
7. Michie S, van Stralen MM, West R: **The behaviour change wheel: a new method for characterising and designing behaviour change interventions.** *Implement Sci* 2011, **6**:42.
8. O'Shea A, Cleary B, McEntee E, Barrett T, O'Carroll A, Drew R, O'Reilly F: **To vaccinate or not to vaccinate? Women's perception of vaccination in pregnancy: a qualitative study.** *BJGP Open* 2018, **2**(2):bjgpopen18X101457.
9. Wilcox CR, Bottrell K, Paterson P, Schulz WS, Vandrevalla T, Larson HJ, Jones CE: **Influenza and pertussis vaccination in pregnancy: Portrayal in online media articles and perceptions of pregnant women and healthcare professionals.** *Vaccine* 2018, **36**(50):7625-7631.
10. Woolf K, McManus IC, Martin CA, Nellums LB, Guyatt AL, Melbourne C, Bryant L, Gogoi M, Wobi F, Al-Oraibi A *et al*: **Ethnic differences in SARS-CoV-2 vaccine hesitancy in United Kingdom healthcare workers: Results from the UK-REACH prospective nationwide cohort study.** *Lancet Reg Health Eur* 2021:100180.
